# Supplementary material for: Origin of the hydrophobicity of sulfur-containing iron surfaces
Source: Royal Society of Chemistry journal article supplement (doi:10.1039/d1cp00588j), 2021-01-01
Supplement: d1cp00588j1.pdf [file d1cp00588j1.pdf]

## Supplementary Information

### Origin of the hydrophobicity of sulfur-containing iron surfaces

Hao Li<sup>a</sup>, Weijie Yang<sup>b</sup>, Chongchong Wu<sup>c,\*</sup>, and Jiang Xu<sup>d,\*</sup>

<sup>a</sup> Department of Physics, Technical University of Denmark, Lyngby 2800, Denmark

<sup>b</sup> Department of Power Engineering, School of Energy, Power and Mechanical Engineering, North China Electric Power University, Baoding 071003, China

<sup>c</sup> Department of Chemical and Petroleum Engineering, University of Calgary, Calgary, Alberta, Canada

<sup>d</sup> College of Environmental and Resource Sciences, Zhejiang University, Hangzhou 310058, China

\*Corresponding Authors:

[chongchong.wu@ucalgary.ca](mailto:chongchong.wu@ucalgary.ca) (C.W.)

[xujiang6@zju.edu.cn](mailto:xujiang6@zju.edu.cn) (J. X.)

## 1 COMPUTATIONAL METHODS

Spin-polarized density functional theory (DFT) calculations were carried out using the Vienna *Ab initio* Simulation Package (VASP).<sup>1</sup> Generalized gradient approximation (GGA) method with the functional by Perdew, Burke, and Ernzerhof was used to describe electronic exchange and correlation.<sup>2</sup> Projector augmented wave method was employed to describe core electrons.<sup>3</sup> Wave functions by Kohn and Sham were expanded in a plane wave basis set to describe valence electrons.<sup>4</sup> A  $(3 \times 3 \times 1)$  Monkhorst–Pack  $k$ -point mesh was used to sample the Brillouin zone in structural optimizations.<sup>5</sup> The Fe surfaces were modelled as 4-layer,  $(3 \times 3)$ , (110) surfaces, based on the characterizations shown in previous studies.<sup>6–9</sup> The bottom two layers were fixed in bulk position, while the topmost two layers were allowed to relax. The N- and P-doped Fe(110) structures were modelled by the same way as the S-doped Fe(110) surfaces. The X-in-Fe(110) (X=S, N, and P) surfaces were modelled by replacing the X atoms with the dopant, while the X-on-Fe(110) surfaces were modelled by directly placing the dopant on the Fe(110) surface. The lattice constant was set as 286.65 pm. In the *ab initio* molecular dynamics simulations, the Gamma version of VASP with  $(1 \times 1 \times 1)$  Monkhorst–Pack  $k$ -point mesh was applied to speed up the calculations. In detail, the canonical ensemble was used to simulate the dynamic behavior of water molecules at 300 K. A relatively long time of 12000 ps with a step of 1 fs was applied. To obtain more accurate results, DFT-D3

corrections by Grimme *et al.*<sup>10</sup> were included in the calculations. The average water-surface distance in the AIMD results is defined as the average distance between the oxygen atoms and the Fe(110) surface.

## **2 EXPERIMENTAL METHODS**

Synthesis of NZVI and SNZVI materials: NZVI and SNZVI particles were synthesized according to previously reported methods.<sup>9,11,12</sup> Briefly, NZVI particles were synthesized by dropwise addition ( $\sim 7 \text{ mL min}^{-1}$ ) of 200 mL of  $34 \text{ g L}^{-1} \text{ NaBH}_4$  solution into a continuously stirred (600 rpm) 200 mL vessel containing  $10 \text{ g L}^{-1} \text{ Fe}^{2+}$  solution under  $\text{N}_2$  purging, followed by 10 min of stirring. SNZVI particles were synthesized by dropwise addition of 200 mL of  $34 \text{ g L}^{-1} \text{ NaBH}_4$  and  $2.2 \text{ g L}^{-1} \text{ Na}_2\text{S}_2\text{O}_4$  solution into 200 mL of a  $10 \text{ g L}^{-1} \text{ Fe}^{2+}$  solution while mixing under nitrogen purging, providing a 0.14 S/Fe molar ratio (dose). The resulting NZVI or SNZVI suspensions were washed three times with deoxygenated DI water, and then dried in a vacuum oven at  $60 \text{ }^\circ\text{C}$  for 8 hours. The vacuum was slowly released by air over 3 hours to stabilize the particles, which were subsequently ground and stored in sealed vials in an anaerobic glovebox prior to use.

Determination of NZVI and SNZVI hydrophobicity: the hydrophobicity of the materials was assessed by measuring the water contact angle according to the method that previously reported.<sup>6,13</sup> 7 mm (diameter) by 1 mm (thick) pellets of each material were created using a Quick-press (PerkinElmer) in the anaerobic glovebox.

Then the pellets were dried in the vacuum oven at 60 °C for 8 hours, and gradually released the pressure with air within 1 hour. The water contact angles of NZVI and SNZVI pellets in the air were measured by a contact angle goniometer (Rame-Hart).

### 3 REFERENCES

- 1 G. Kresse and J. Furthmüller, Efficient iterative schemes for ab initio total-energy calculations using a plane-wave basis set, *Phys. Rev. B*, 1996, **54**, 11169–11186.
- 2 J. P. Perdew, K. Burke and M. Ernzerhof, Generalized Gradient Approximation Made Simple, *Phys. Rev. Lett.*, 1996, **77**, 3865–3868.
- 3 P. E. Blöchl, Projector augmented-wave method, *Phys. Rev. B*, 1994, **50**, 17953–17979.
- 4 W. Kohn and L. J. Sham, Self-consistent equations including exchange and correlation effects, *Phys. Rev.*, 1965, **140**, A1133.
- 5 H. Monkhorst and J. Pack, Special points for Brillouin zone integrations, *Phys. Rev. B*, 1976, **13**, 5188–5192.
- 6 J. Xu, A. Avellan, H. Li, X. Liu, V. Noël, Z. Lou, Y. Wang, R. Kaegi, G. Henkelman and G. V. Lowry, Sulfur Loading and Speciation Control the Hydrophobicity, Electron Transfer, Reactivity, and Selectivity of Sulfidized Nanoscale Zerovalent Iron, *Adv. Mater.*, 2020, **32**, 1906910.

- 7 Z. Cao, H. Li, X. Xu and J. Xu, Correlating surface chemistry and hydrophobicity of sulfidized nanoscale zerovalent iron with its reactivity and selectivity for denitration and dechlorination, *Chem. Eng. J.*, 2020, **394**, 124876.
- 8 Z. Cao, J. Xu, H. Li, T. Ma, L. Lou, G. Henkelman and X. Xu, Dechlorination and defluorination capability of sulfidized nanoscale zerovalent iron with suppressed water reactivity, *Chem. Eng. J.*, 2020, **400**, 125900.
- 9 J. Xu, A. Avellan, H. Li, E. A. Clark, G. Henkelman, R. Kaegi and G. V. Lowry, Iron and Sulfur Precursors Affect Crystalline Structure, Speciation, and Reactivity of Sulfidized Nanoscale Zerovalent Iron, *Environ. Sci. Technol.*, 2020, **54**, 13294–13303.
- 10 S. Grimme, J. Antony, S. Ehrlich and H. Krieg, A consistent and accurate ab initio parametrization of density functional dispersion correction (DFT-D) for the 94 elements H-Pu, *J. Chem. Phys.*, 2010, **132**, 154104.
- 11 C. B. Wang and W. X. Zhang, Synthesizing nanoscale iron particles for rapid and complete dechlorination of TCE and PCBs, *Environ. Sci. Technol.*, 1997, **31**, 2154–2156.
- 12 E. J. Kim, J. H. Kim, A. M. Azad and Y. S. Chang, Facile synthesis and characterization of Fe/FeS nanoparticles for environmental applications, *ACS*

*Appl. Mater. Interfaces*, 2011, **3**, 1457–1462.

- 13 J. Xu, Y. Wang, C. Weng, W. Bai, Y. Jiao, R. Kaegi and G. V. Lowry, Reactivity, Selectivity, and Long-Term Performance of Sulfidized Nanoscale Zerovalent Iron with Different Properties, *Environ. Sci. Technol.*, 2019, **53**, 5936–5945.

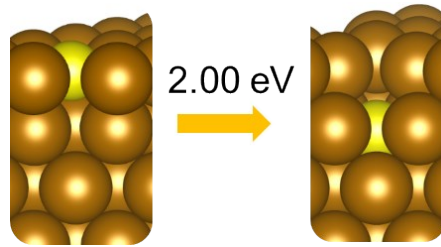

**Figure S1.** The process of a S atom at S-in-Fe(110) surface swapping with a subsurface Fe atom. Brown and yellow spheres represent Fe and S atoms, respectively.
